# Supplementary material for: Insights into the electron transport performance of the FAPbI3/SnO2interface
Source: Royal Society of Chemistry journal article supplement (doi:10.1039/d3tc01345f), 2023-01-01
Supplement: d3tc01345f1.pdf [file d3tc01345f1.pdf]

## Supporting Information

### Insight into electron transport performance of FAPbI<sub>3</sub>/SnO<sub>2</sub> interface

Xiangxiang Feng <sup>1</sup>, Biao Liu <sup>1\*</sup>, Mengqiu Cai <sup>2</sup>, Junliang Yang <sup>1</sup>

*1. Hunan Key Laboratory for Super-microstructure and Ultrafast Process, School of Physics and Electronics, Central South University, Changsha 410083, Hunan, China*

*2. School of Physics and Electronics Science, Hunan University, Changsha 410082, Hunan, China*

\*Corresponding author. E-mail: [bliu612@csu.edu.cn](mailto:bliu612@csu.edu.cn).

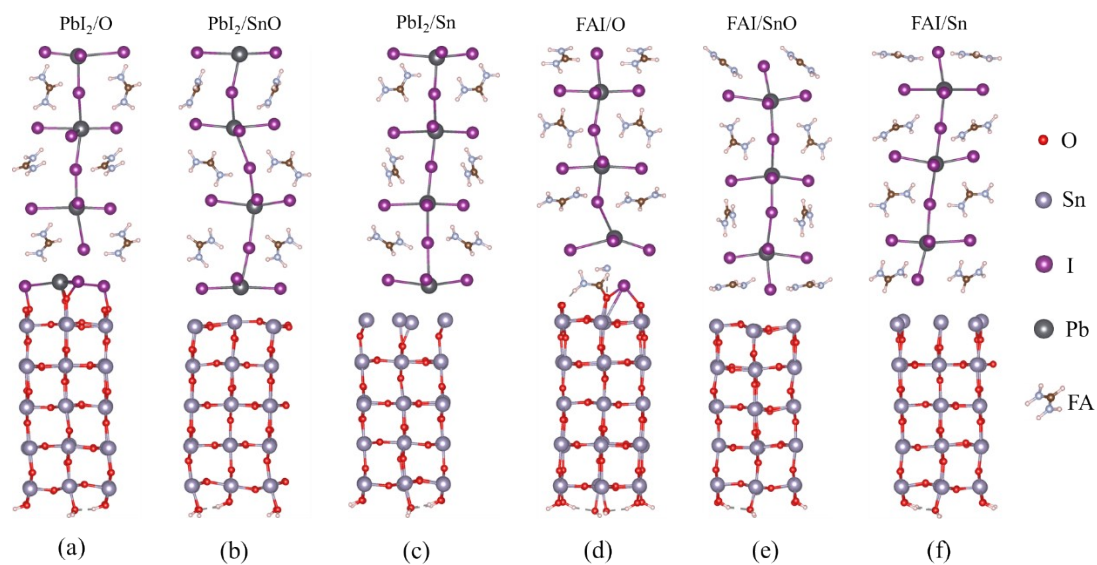

**FIG. S1.** Representative snapshot of AIMD trajectory at 300 K. (a-c) The  $\text{PbI}_2/\text{O}$ ,  $\text{PbI}_2/\text{SnO}$  and  $\text{PbI}_2/\text{Sn}$  interfaces. (d-f) The  $\text{FAI}/\text{O}$ ,  $\text{FAI}/\text{SnO}$  and  $\text{FAI}/\text{Sn}$  interfaces.

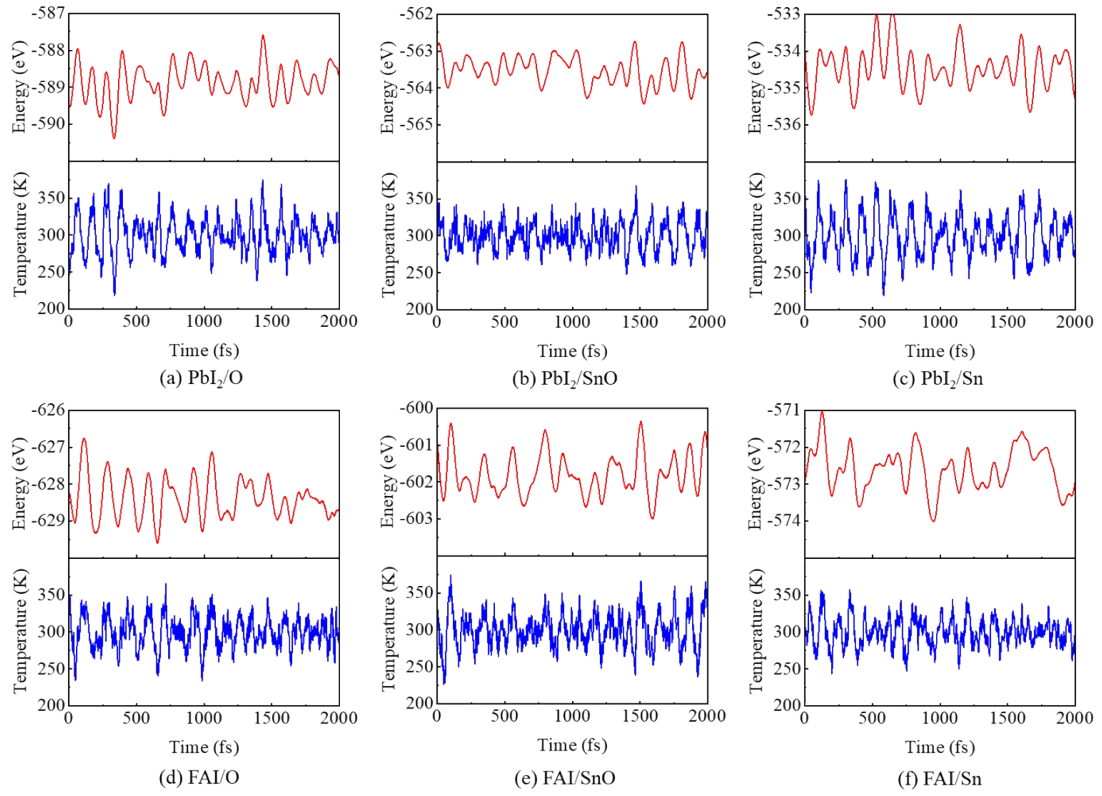

**FIG. S2.** AIMD simulations of the interfaces at the 300K. Red lines represent fluctuations of energy with time, and blue lines represent fluctuations of temperature with time. (a-c) The  $\text{PbI}_2/\text{O}$ ,  $\text{PbI}_2/\text{SnO}$  and  $\text{PbI}_2/\text{Sn}$  interfaces. (d-f) The  $\text{FAI}/\text{O}$ ,  $\text{FAI}/\text{SnO}$  and  $\text{FAI}/\text{Sn}$  interfaces.

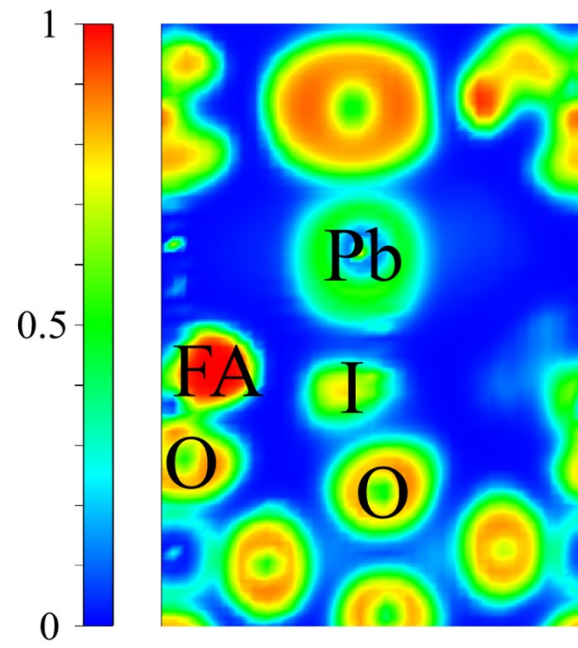

**FIG. S3.** 2D maps of the ELF fields perpendicular to the FAI/O interface. One means complete electron localization, and zero means complete electron delocalization.

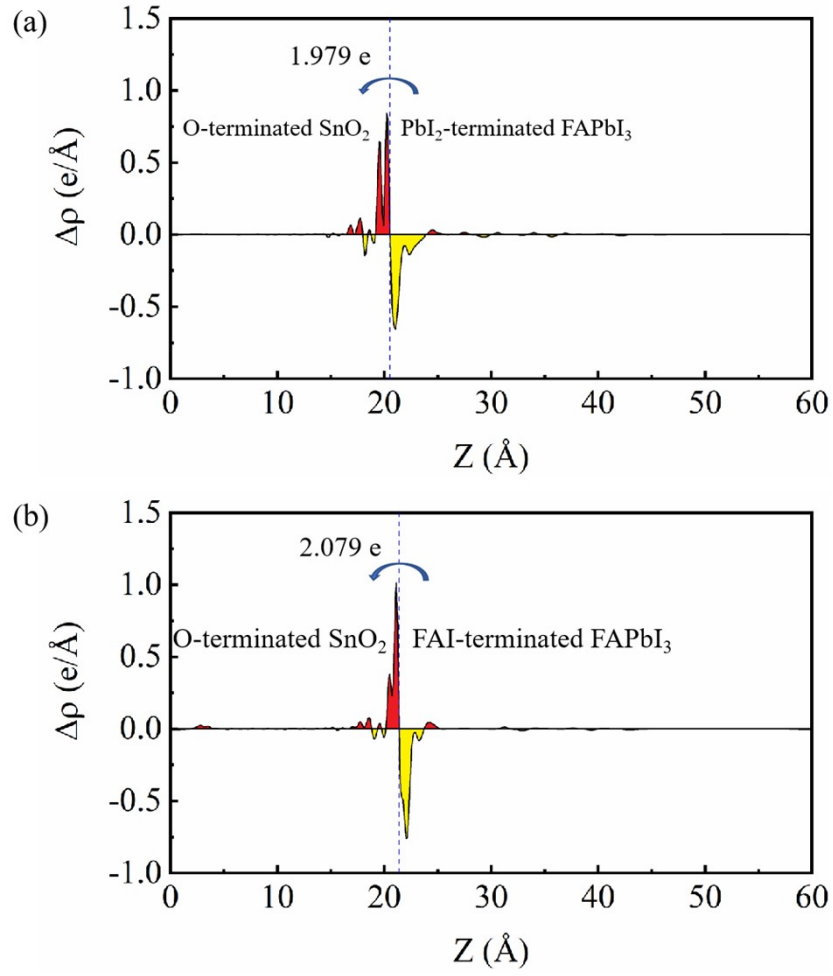

**FIG. S4.** Plane-averaged charge density difference along the Z direction coupling with Bader charge analysis in the (a)  $\text{PbI}_2/\text{O}$  interface and (b)  $\text{FAI}/\text{O}$  interface.

\*The charge density difference  $\Delta\rho$  is given by:

$$\Delta\rho = \rho_{A+B} - \rho_A - \rho_B \quad (1)$$

Where  $\rho_{A+B}$ ,  $\rho_A$  and  $\rho_B$  are the plane-averaged charge density of the total heterostructures, free-standing A slab, and free-standing B slab, respectively.

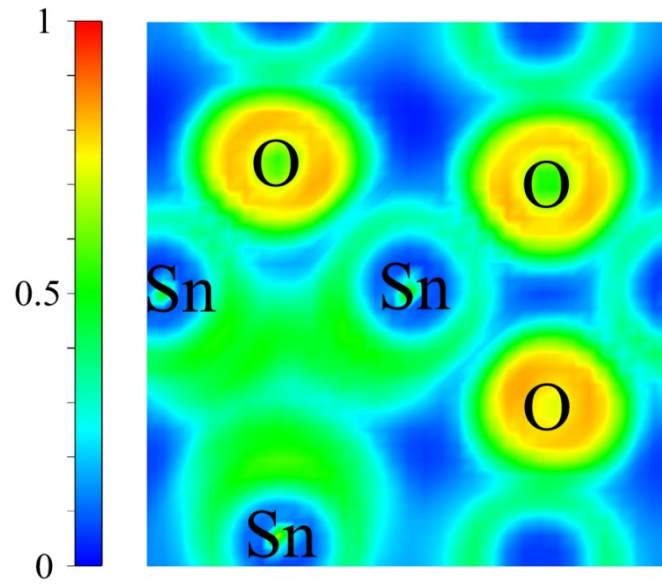

**FIG. S5.** 2D map of the ELF field on the SnO surface of  $\text{PbI}_2/\text{SnO}$  interface with an O vacancy. One means complete electron localization, and zero means complete electron delocalization.

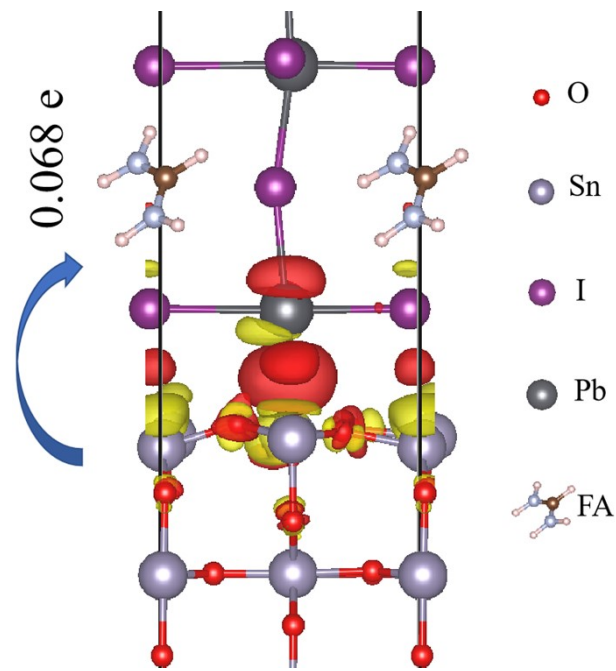

**FIG. S6.** Charge density difference coupling with Bader charge analysis on the  $\text{PbI}_2/\text{SnO}$  interface with an O vacancy. The value of the isosurface is  $1 \times 10^{-3} e$  per  $\text{born}^3$ . Red represents gain electrons, and yellow represents lose electrons.

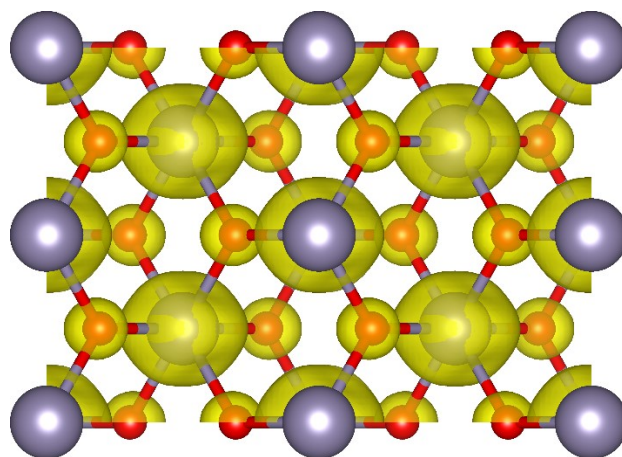

**FIG. S7.** Charge density at SnO<sub>2</sub> conduction band minimum.



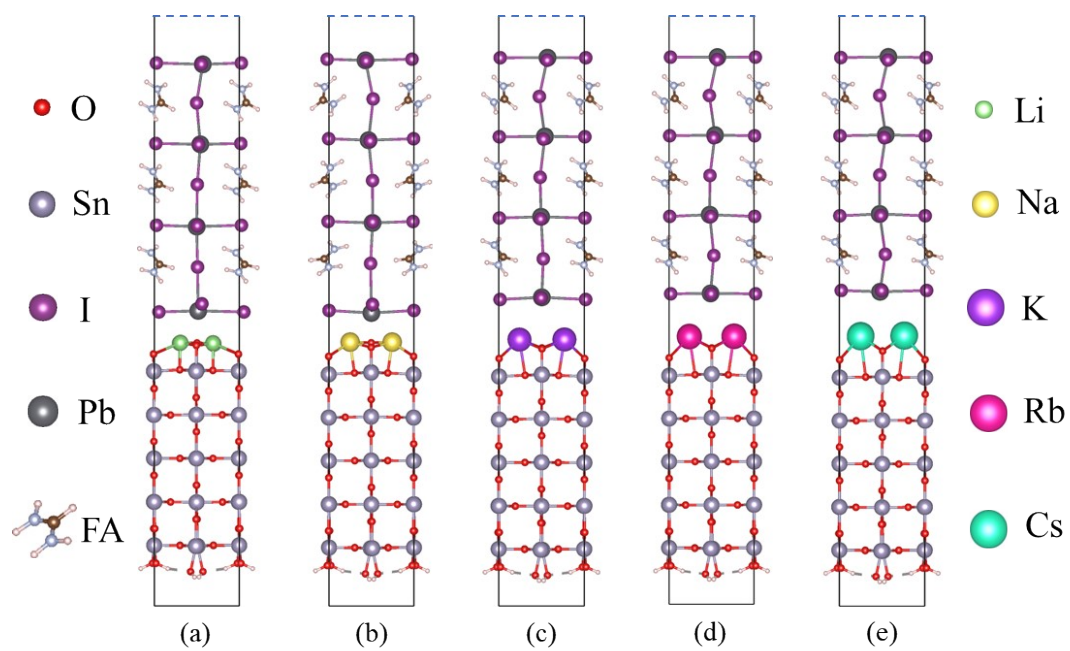

**FIG. S8.** Side views of the  $\text{PbI}_2/\text{O}$  interfaces modified by the alkali metal elements [(a) Li, (b) Na, (c) K, (d) Rb and (e) Cs].

**Table SI.** Calculated lattice parameters (in Å) of FAPbI<sub>3</sub>, SnO<sub>2</sub> and SnI<sub>4</sub> bulk.

|            |   | FAPbI <sub>3</sub> | SnO <sub>2</sub>   | SnI <sub>4</sub>   |
|------------|---|--------------------|--------------------|--------------------|
| This work  | x | 6.415              | 4.832              | 6.757              |
|            | y | 6.415              | 4.832              | 6.757              |
|            | z | 6.415              | 3.243              | 6.757              |
| Other work | x | 6.352 <sup>1</sup> | 4.737 <sup>2</sup> | 6.686 <sup>3</sup> |
|            | y | 6.352              | 4.737              | 6.686              |
|            | z | 6.352              | 3.185              | 6.686              |

**Table SII.** The relaxed lattice parameters (in Å) for the FAPbI<sub>3</sub>/SnO<sub>2</sub> interface models.

|   | PbI <sub>2</sub> /O, | PbI <sub>2</sub> /SnO | PbI <sub>2</sub> /Sn | FAI/O | FAI/SnO | FAI/Sn |
|---|----------------------|-----------------------|----------------------|-------|---------|--------|
| x | 6.39                 | 6.43                  | 6.42                 | 6.38  | 6.39    | 6.40   |
| y | 6.68                 | 6.68                  | 6.64                 | 6.66  | 6.69    | 6.64   |
| z |                      |                       | 60                   |       |         |        |

**Table SIII.** Interface binding energies (in meV/Å<sup>2</sup>) of FAPbI<sub>3</sub>/SnO<sub>2</sub> interface.

| FAPbI <sub>3</sub> -SnO <sub>2</sub> | PbI <sub>2</sub> | FAI   |
|--------------------------------------|------------------|-------|
| O                                    | -65.8            | -70.5 |
| SnO                                  | -4.7             | -4.2  |
| Sn                                   | -16.4            | -14.4 |

\*The interface binding energies  $\Delta E$  is given by:

$$\Delta E = \frac{E_{A+B} - E_A - E_B}{S} \quad (2)$$

Where  $S$  is the area of the interface,  $E_A$  is the energy of A slab,  $E_B$  is the energy of B slab and  $E_{A+B}$  is the total energy of the heterostructure in the heterostructure lattice.

(1) Slimi, B.; Mollar, M.; Assaker, I. B.; Kriaa, I.; Chtourou, R.; Marí, B. *Energy Procedia*. **2016**, *102*, 87-95.

(2) Dhage, S.; Samuel, V.; Pasricha, R.; Ravi, V. *Ceram. Int.* **2006**, *32* (8), 939-941.

(3) Dawson, M.; Ribeiro, C.; Morelli, M. R. *Mater. Sci. Semicond. Process.* **2021**, *132*, 105908.
